# Supplementary material
Source: publisher figshare collection journal article supplement (https://wiley.figshare.com/articles/dataset/_/3559095)
Supplement: Supplementary file 2 [file 1 › appendix-A.htm]

Ecological Archives E095-095-A1


*Ecological Archives* E095-095-A1

John M. Drake. 2014. Tail probabilities of extinction time in a large number of experimental populations. *Ecology* 95:1119–1126. http://dx.doi.org/10.1890/13-1107.1

Appendix A. The statistical analysis of extinction times of 1074 experimental populations of *Daphnia pulicaria*.

> View / download PDF.


---

[Back to E095-095]
